# Supplementary material for: Interindividual variation in gut microbial formation of 8-prenylnaringenin results in increased, but sub-estrogenic, internal exposure
Source: Research Square preprint supplement (doi:10.21203/rs.3.rs-6511068/v1), 2025-04-29
Supplement: Supplementary file 1 [file 507b1ea732029158a41c8d32.docx]

**;Interindividual variation in gut microbial formation of 8-prenylnaringenin results in increased, but sub-estrogenic, internal exposure**

;Date: 2025-04-23
;Developed by: Maja Stevanoska, Georg Aichinger
;Compiled by: Maja Stevanoska
;Organization: Laboratory of Toxicology, D-HEST, ETH Zurich
;To execute the model, copy-paste the text to Berkeley Madonna

;Model code:

;=====================================================================

{Globals}

;=====================================================================

;Physiological parameters

;=====================================================================

;bodyweight

BW = 60 ;kg ;BW of mean Caucasian female ;reference: 1

;--------------------------------------------------------------------------------------------------------------------

;relative tissue volumes ;fraction of BW ;reference: 1

VGc = 0.014666 ;fraction of gut (small intestine) tissue

VLc = 0.02333 ;fraction of liver tissue

VPc = 0.0216666 ;fraction portal vein perfused tissue (stomach, spleen, pancreas, large intestine)

VRc = 0.033283 ;fraction of rapidly perfused tissue (heart, lungs, brain)

VSc = 0.456666 ;fraction of slowly perfused tissue (bone, skin, muscle)

VFc = 0.31666 ;fraction of fat (adipose) tissue

VKc = 0.004583 ;fraction of kidneys

VUc= 0.001333 ;fraction of uterus

VBc = 0.068333 ;fraction of blood

VBrc= 0.0083333 ;fraction of breast tissue

VRestc= 0.0594 ;fraction of the rest of the body

;--------------------------------------------------------------------------------------------------------------------

;calculated tissue volumes

VG = VGc*BW ;L or Kg ;volume of gut tissue (calculated)

VL = VLc*BW ;L or Kg ;volume of liver tissue (calculated)

VP = VPc*BW ;L or kg ;volume of portal vein perfused tissue (calculated)

VR = VRc*BW ;L or Kg ;volume of rapidly perfused tissue (calculated)

VS = VSc*BW ;L or Kg ;volume of slowly perfused tissue (calculated)

VF = VFc*BW ;L or Kg ;volume of fat tissue (calculated)

VK = VKc*BW ;L or Kg ;volume of kidney (calculated)

VB = VBc*BW ;L or Kg ;volume of blood (calculated)

VU= VUc*BW ;L or kg ;volume of uterus (calculated)

VBr= VBrc* BW ;L or Kg ;volume of breast tissue (calculated)

VSI = 9.03 ;L ;volume of small intestine lumen ;reference: 2

VLI = 7.5 ;L ;volume of large intestine lumen ;reference: 2

;--------------------------------------------------------------------------------------------------------------------

;Blood flow rates, human female ;reference: 1

QC = 354 ;L/h ;cardiac output, resting human female ;reference: 1

QGc = 0.11 ;fraction of blood flow to gut (small intestine)

QPc = 0.1 ;fraction of blood flow to Portal vein perfused tissues

QLAc = 0.065 ;fraction of blood flow to liver via artery

QLc = 0.27 ;fraction of blood flow to liver in total

QRc = 0.195 ;fraction of blood flow to rapidly perfused tissue (heart, lungs, brain)

QSc = 0.22 ;fraction of blood flow to slowly perfused tissue (skin, bone, muscle)

QFc = 0.085 ;fraction of blood flow to fat

QKc = 0.17 ;fraction of blood flow to kidneys

QUc= 0.0004 ;fraction of blood to uterus

QBrc= 0.004 ;fraction of blood flow to breast

QG = QGc*QC ;blood flow to gut (calculated)

QP = QPc*QC ;blood flow to portal vein perfused tissue (calculated)

QLA = QLAc*QC ;blood flow to liver via artery (calculated)

QL = QLc*QC ;blood flow to liver total (calculated)

QR = QRc*QC ;blood flow to rapidly perfused tissue (calculated)

QS = QSc*QC ;blood flow to slowly perfused tissue (calculated)

QF = QFc*QC ;blood flow to fat tissue (calculated)

QK = QKc*QC ;blood flow to kidney (calculated)

QU= QUc* QC ;blood flow to uterus (calculated)

QBr= QBrc*QC ;L or Kg ;blood flow to breast tissue (calculated)

;--------------------------------------------------------------------------------------------------------------------

;glomerular filtration rate ;reference: 3

GFR = 125 ;mL/min/173m2

;=====================================================================

;Physicochemical parameters

;=====================================================================

;partition coefficients ;calculated by Rodgers and Rowland method, qivivetools.wu.nl ;reference: 4

;iXN in main model ;reference: 5

PGIXN = 8.35 ;gut/blood partition coefficient

PPIXN = 2.12 ;portal vein perfused tissue/blood partition coefficient (spleen)

PLIXN = 4.19 ;liver/blood partition coefficient

PRIXN = 5.52 ;rapidly perfused tissue/blood partition coefficient ;average (heart, brain, lung)

PSIXN = 6.2 ;slowly perfused tissue/blood partition coefficient ;average (skin, bone, muscle)

PFIXN = 13.93 ;fat/blood partition coefficient

PKIXN = 3.94 ;kidney/blood partition coefficient

PUIXN= 2.48 ;uterus/blood partition coefficient ;same as muscle

PBrIXN= 5.154 ; breast tissue partition coefficient based on adipose tissue percentage

FUIXN = 0.026 ;faction unbound plasma ;Lobell&Sivarajah algorithm ;reference: 4

;iXN Glucuronide (IXNGluc) in sub-model

PGIXNGluc = 0.93 ;gut/blood partition coefficient

PPIXNGluc = 0.40 ;portal vein perfused tissue/blood partition coefficient ;spleen

PLIXNGluc = 0.57 ;liver/blood partition coefficient

PRIXNGluc = 0.68 ;rapidly perfused tissue/blood partition coefficient ;average (heart, brain, lung)

PSIXNGluc = 0.72 ;slowly perfused tissue/blood partition coefficient ;average (skin, bone, muscle)

PFIXNGluc = 0.84 ;fat/blood partition coefficient

PKIXNGluc = 0.59 ;kidney/blood partition coefficient

PUIXNGluc= 0.46 ;uterus/blood partition coefficient ;same as muscle

PBrIXNGluc= 0.3108 ; breast tissue partition coefficient based on adipose tissue percentage

FUIXNGluc = 0.363 ;faction unbound plasma ;Lobell&Sivarajah algorithm ;reference: 4

;8PN in sub-model (LogP 4.3 pKa 7.7) ;reference: 5

PG8PN = 12.62 ;gut/blood partition coefficient

PP8PN = 3.18 ;portal vein perfused tissue/blood partition coefficient (spleen)

PL8PN = 6.33 ;liver/blood partition coefficient

PR8PN = 8.32 ;rapidly perfused tissue/blood partition coefficient ;average (heart, brain, lung)

PS8PN = 9.36 ;slowly perfused tissue/blood partition coefficient ;average (skin, bone, muscle)

PF8PN = 24.25 ;fat/blood partition coefficient

PK8PN = 5.93 ;kidney/blood partition coefficient

PU8PN= 3.74 ;uterus/blood partition coefficient same as muscle value

PBr8PN= 8.9725 ;breast tissue partition coefficient based on adipose tissue percentage

FU8PN = 0.023 ;faction unbound plasma ;Lobell&Sivarajah algorithm ;reference: 4

;8PNGluc in sub-model

PG8PNGluc = 0.54 ;gut/blood partition coefficient

PP8PNGluc = 0.28 ;portal vein perfused tissue/blood partition coefficient

PL8PNGluc = 0.35 ;liver/blood partition coefficient

PR8PNGluc = 0.42 ;rapidly perfused tissue/blood partition coefficient ;average (heart, brain, lung)

PS8PNGluc = 0.43 ;slowly perfused tissue/blood partition coefficient ;average (skin, bone, muscle)

PF8PNGluc = 0.29 ;fat/blood partition coefficient

PK8PNGluc = 0.39 ;kidney/blood partition coefficient

PU8PNGluc= 0.31 ;uterus/blood partition coefficient same as muscle value

PBr8PNGluc= 0.1073 ; breast tissue partition coefficient based on adipose tissue percentage

FU8PNGluc = 0.323 ;faction unbound plasma ;Lobell&Sivarajah algorithm ;reference: 4

;--------------------------------------------------------------------------------------------------------------------

;molecular weight

MWIXN = 354.39 ;molecular weight IXN

MWIXNGluc = 530.52 ;molecular weight IXNGluc (obtained from ChemDraw 19.0 Software)

MW8PN= 340.375 ;molecular weight 8PN

MW8PNGluc= 516.5 ;molecular weight 8PNGluc (obtained from ChemDraw 19.0 Software)

;--------------------------------------------------------------------------------------------------------------------

;Oral dose

ODOSEIXN=0.8 ;mg ;oral dose iXN variable

AODOSEIXN=ODOSEIXN*1000/MWIXN ;µmol

ODOSE8PN= 0.25 ;mg ;oral dose 8-PN variable

AODOSE8PN=ODOSE8PN*1000/MW8PN ;µmol

;--------------------------------------------------------------------------------------------------------------------

;gastrointestinal tract

tpassSI = 4.3 ;h ;passing time through small intestine ;reference: 6

Ksi = 1/tpassSI ;/h ;SI to LI transfer constant

tpassLI = 24.2 ;h ;passing time through large intestine ;reference: 6

Kli = 1/tpassLI ;/h ;LI to excretion transfer constant

;--------------------------------------------------------------------------------------------------------------------

;surface areas

areaSI = 72.1 ;dm2 ;surface area of SI lumen ;reference: 2

areaLI = 47.12 ;dm2 ;surface area of LI lumen ;reference: 2

;--------------------------------------------------------------------------------------------------------------------

;absorption/transfer rates iXN

logPappIXN = -5.217090041 ;log(cm/s) ;measured Papp *in vitro*

PeffIXN = (3600/10)*(10^(0.6836*logPappIXN-0.5579))

;dm/h ;scaled according to Sun *et al*. ;reference: 7

KaIXN = PeffIXN*areaSI ;L/h ;transfer rate of IXN from SI lumen to liver

KbIXN = PeffIXN*areaLI ;L/h ;transfer rate of IXN from LI lumen to liver

;absorption/transfer rates 8PN

logPapp8PN =-5.140978035 ;log(cm/s) ;measured Papp in vitro ;log(cm/s)

Peff8PN = (3600/10)*(10^(0.6836*logPapp8PN-0.5579))

;dm/h ;scaled according to Sun *et al.* ;reference: 7

Ka8PN = Peff8PN*areaSI ;L/h ;transfer rate of 8PN from SI lumen to liver

Kb8PN = Peff8PN*areaLI ;L/h ;transfer rate of 8PN from LI lumen to liver

;--------------------------------------------------------------------------------------------------------------------

;=====================================================================

;Kinetic parameters

;=====================================================================

;hepatic metabolism

;scaling factors

VLS9 = 107.3 ;mg S9 protein/gram liver ;liver S9 protein yield ;reference: 8

SFmprot=40 ;(mg microsomal protein/g liver) ;liver microsome protein yield  ;reference: 8

L=VLc*1000 ;gram/kg BW ;fraction liver tissue

cCYP1A2 = 52 ;(pmol/mg microsomal protein) ;CYP1A2 yield ;reference: 9

ISEF= 0.17 ;intersystem extrapolation factor for CYP1A2 ;reference: 9

;--------------------------------------------------------------------------------------------------------------------

;IXN phase II metabolism ;hepatic glucuronidation

VmaxLIXNGluc= 1.615 ;nmol/min/mg S9 protein ;unscaled maximum rate ;experimental

VmaxLIXNGlucs = VmaxLIXNGluc/1000*60* VLS9 *L*BW ;µmol/h ; scaled maximum rate

KmLIXNGluc = 6.33 ;µmol/L ;affinity constant ;experimental

;--------------------------------------------------------------------------------------------------------------------

;IXN phase I metabolism ;8PN formation in the liver

VmaxLiXN8PNc = 5.47 ;(pmol/min)/pmol CYP1A2 ;unscaled maximum rate ;reference: 10

VmaxLiXN8PNs = (VmaxLiXN8PNc*cCYP1A2*SFmprot*ISEF)/1000000*60*L*BW ;µmol/h ;scaled maximum rate

KmLiXN8PN = 17.8 ;µM ;affinity constant ;reference: 10

FLiXN8PNc=VmaxLiXN8PNs*CVLIXN/(KmLiXN8PN+CVLIXN) ;function for hepatic 8PN formation

;--------------------------------------------------------------------------------------------------------------------

;intestinal metabolism

;scaling factors

VGS9 = 35.2 ;mg S9 protein/gram SI ;SI S9 protein yield ;reference: 11

G=VGc*1000 ;g/kg BW ;fraction gut tissue

;--------------------------------------------------------------------------------------------------------------------

;IXN phase II metabolism ;intestinal glucuronidation

VmaxGIXNGluc = 0.7983 ;nmol/min/mg S9 protein ;unscaled maximum rate ;experimental

VmaxGIXNGlucs = VmaxGIXNGluc/1000*60* VGS9 *G*BW ;µmol/h ;scaled maximum rate

KmGIXNGluc = 6.068 ;µmol/L ;affinity constant ;experimental

;--------------------------------------------------------------------------------------------------------------------

;8PN phase II metabolism ;hepatic glucuronidation

VmaxL8PN = 0.7927 ;nmol/min/mg S9 protein ;unscaled maximum rate ;experimental

VmaxL8PNs = VmaxL8PN/1000*60*VLS9*L*BW ;µmol/h ;scaled maximum rate

KmL8PN = 0.7658 ;µmol/L ;affinity constant ;experimental

;--------------------------------------------------------------------------------------------------------------------

;8PN phase II metabolism-glucuronidation intestinal tissue

VmaxG8PN = 1.25 ;nmol*min-1*mg-1 ;unscaled maximum rate ;experimental

VmaxG8PNs = VmaxG8PN/1000*60* VGS9 *G*BW ;µmol/h ;scaled maximum rate

KmG8PN = 0.3241 ;µmol/L ;affinity constant ;experimental

;--------------------------------------------------------------------------------------------------------------------

;microbial 8PN formation

VmaxM8PN= 0.00051 ;µmol/h/g ;unscaled maximal rate ;experimental

KmM8PN= 30.59 ;µmol/L ;affinity constant ;experimental

VmaxM8PNs= VmaxM8PN*1000*VMB*BW ;scaled maximum rate

VMB=0.0140 ;scaling to gastrointestinal tract contents ;reference: 12

;FM8PN= VmaxM8PNs*CLIIXN/(KmM8PN+CLIIXN) ;function for microbial 8PN formation

;=====================================================================

;Main model calculations/dynamics: isoxanthohumol

;=====================================================================

;small intestine compartment

;ASIIXN: amount of IXN in small intestinal lumen ;µmol

CSIIXN=ASIIXN/VSI ;µmol/L

CSIIXNnm=CSIIXN*1000 ;nM

;--------------------------------------------------------------------------------------------------------------------

;large intestinal lumen compartment

;ALIIXN: amount of IXN in large intestine lumen ;µmol

CLIIXN = ALIIXN/VLI ;µmol/Lmol

CLIIXNnm=CLIIXN*1000 ;nM

;--------------------------------------------------------------------------------------------------------------------

;gut tissue compartment

;AGIXN: amount of IXN in gut tissue ;µmol

CGIXN = AGIXN/VG ;µmol/L

CVGIXN = CGIXN/PGIXN ;partition with gut tissue

CGIXNnm=CGIXN*1000 ;nM

;--------------------------------------------------------------------------------------------------------------------

;liver compartment

;ALIXN: amount of IXN in liver ;µmol

CLIXN = ALIXN/VL ;µmol/L

CVLIXN = CLIXN/PLIXN ;partition with liver tissue

CLIXNnm=CLIXN*1000 ;nM

;--------------------------------------------------------------------------------------------------------------------

;portal vein perfused tissue compartment

;APIXN: amount of IXN in spleen tissue ;µmol

CPIXN = APIXN/VP ;µmol/L

CVPIXN = CPIXN/PPIXN ;partition with portal vein perfused tissue

CPIXNnm=CPIXN*1000 ;nM

;----------------------------------------------------------------------------------------------------------------------

;blood compartment

CBIXN=ABIXN/VB ;µmol/L

CVBIXN = CBIXN*FUIXN ;free concentration in plasma

CBIXNug = CBIXN*MWIXN ;µg/L = ng/mL ;concentration in blood in ng/ml

CBIXNnm=CBIXN*1000 ;nM

;--------------------------------------------------------------------------------------------------------------------

;fat (adipose tissue) compartment

;AFXN: amount of IXN in fat ;µmol

CFIXN = AFIXN/VF ;µmol/L

CVFIXN = CFIXN/PFIXN ;partition with adipose tissue

CFIXNnm=CFIXN*1000 ;nM

;--------------------------------------------------------------------------------------------------------------------

;rapidly perfused tissue

;ARIXN: amount of IXN in rapidly perfused tissue ;µmol

CRIXN = ARIXN/VR ;µmol/L

CVRIXN = CRIXN/PRIXN ;partition with rapidly perfused tissue

CRIXNnm=CRIXN*1000 ;nM

;--------------------------------------------------------------------------------------------------------------------

;slowly perfused tissue

;ASIXN: amount of IXN in slowly perfused tissue ;µmol

CSIXN = ASIXN/VS ;µmol/L

CVSIXN = CSIXN/PSIXN ;partition with slowly perfused tissue

CSIXNnm=CSIXN*1000 ;nM

;--------------------------------------------------------------------------------------------------------------------

;kidney

;AKIXN: amount of IXN in kidney ;µmol

CKIXN = AKIXN/VK ;µmol/L

CVKIXN = CKIXN/PKIXN ;partition with kidney tissue

CKIXNnm=CKIXN*1000 ;nM

;--------------------------------------------------------------------------------------------------------------------

;uterus

;AUIXN: amount of iXN in uterus ;µmol

CUIXN= AUIXN/VU ;µmol/L

CUIXNnm= CUIXN*1000 ;µmol/L

CVUIXN= CUIXN/PUIXN ;partition with uterus

CUIXNnm=CUIXN*1000 ;nM

;--------------------------------------------------------------------------------------------------------------------

; breast tissue

; ABrIXN: amount of iXN in breast tissue ;µmol

CBrIXN= ABrIXN/VBr ;µmol/L

CBrIXNnm= CBrIXN*1000 ;µmol/L

CVBrIXN= CBrIXN/PBrIXN ;partition with breast tissue

CBrIXNnm=CBrIXN*1000 ;nM

;=========================================================================

;--------------------------------------------------------------------------------------------------------------------

;Sub-model calculations/dynamics: iXN glucuronide

;=========================================================================

;--------------------------------------------------------------------------------------------------------------------

;gut tissue compartment

;AGIXNGluc: amount of IXN glucuronide in gut tissue ;µmol

CGIXNGluc = AGIXNGluc/VG ;µmol/L

CVGIXNGluc = CGIXNGluc/PGIXNGluc ;partition with gut tissue

;--------------------------------------------------------------------------------------------------------------------

;liver compartment

;ALIXNGluc: amount of IXN glucuronide in liver ;µmol

CLIXNGluc = ALIXNGluc/VL ;µmol/L

CVLIXNGluc = CLIXNGluc/PLIXNGluc ;partition with liver tissue

;--------------------------------------------------------------------------------------------------------------------

;fat (adipose tissue) compartment

;AFIXNGluc = amount of IXN glucuronide in fat tissue ;µmol

CFIXNGluc = AFIXNGluc/VF ;µmol/L

CVFIXNGluc = CFIXNGluc/PFIXNGluc ;partition with fat tissue

;--------------------------------------------------------------------------------------------------------------------

;portal vein perfused compartment

;APIXNGluc = amount of IXN glucuronide in portal vein perfused tissue ;µmol

CPIXNGluc = APIXNGluc/VP ;µmol/L

CVPIXNGluc = CPIXNGluc/PPIXNGluc ;partition with portal vein perfused tissue

;--------------------------------------------------------------------------------------------------------------------

;blood compartment

;ABIXNGluc: amount of IXN glucuronide in blood ;µmol

CBIXNGluc=ABIXNGluc/VB ;µmol/L

CVBIXNGluc = CBIXNGluc*FUIXNGluc ;concentration of free IXNGluc in plasma

CBIXNGlucnm=CBIXNGluc*1000

CBIXNGlucug = CBIXNGluc*MWIXNGluc ;concentration in blood in ng/mL

;--------------------------------------------------------------------------------------------------------------------

;rapidly perfused tissue

;ARIXNGluc = amount of iXN glucuronide in rapidly perfused tissue ;µmol

CRIXNGluc = ARIXNGluc/VR ;µmol/L

CVRIXNGluc = CRIXNGluc/PRIXNGluc ;partition with rapidly perfused tissue

;--------------------------------------------------------------------------------------------------------------------

;slowly perfused tissue

;ASIXNGluc = amount of iXN glucuronide in slowly perfused tissue ;µmol

CSIXNGluc = ASIXNGluc/VS ;µmol/L

CVSIXNGluc = CSIXNGluc/PSIXNGluc ;partition with slowly perfused tissue

;--------------------------------------------------------------------------------------------------------------------

;kidney

;AKIXNGluc: amount of IXN glucuronide in kidney ;µmol

CKIXNGluc = AKIXNGluc/VK ;µmol/L

CVKIXNGluc = CKIXNGluc/PKIXNGluc ;partition with kidney tissue

;--------------------------------------------------------------------------------------------------------------------

;uterus

;AUIXNGluc= amount of iXNGluc in uterus ;µmol

CUIXNGluc= AUIXNGluc/VU ;µmol/L

CUIXNGlucnm= CUIXNGluc*1000 ;nM

CVUIXNGluc= CUIXNGluc/PUIXNGluc ;partition with uterus

;--------------------------------------------------------------------------------------------------------------------

; breast tissue

; ABrIXNGluc: amount of iXNGluc in breast tissue ;µmol

CBrIXNGluc= ABrIXNGluc/VBr ;µmol/L

CBrIXNGlucnm= CBrIXNGluc*1000 ;nM

CVBrIXNGluc= CBrIXNGluc/PBrIXNGluc ;partition with breast tissue

;--------------------------------------------------------------------------------------------------------------------

;=========================================================================

;Sub-model calculations/dynamics: 8PN

;=========================================================================

;--------------------------------------------------------------------------------------------------------------------

;liver compartment

;AL8PN: amount of 8PN in liver ;µmol

CL8PN= AL8PN/VL ;µmol/L

CVL8PN= CL8PN/PL8PN ;partition with liver tissue

CL8PNnm=CL8PN*1000 ;nM

;--------------------------------------------------------------------------------------------------------------------

;gut tissue compartment

;AG8PN: amount of 8PN in gut tissue ;µmol

CG8PN= AG8PN/VG ;µmol/L

CVG8PN= CG8PN/PG8PN ;partition with gut tissue

CG8PNnm=CG8PN*1000 ;nM

;--------------------------------------------------------------------------------------------------------------------

;blood compartment

;AB8PN: amount of 8PN in blood ;µmol

CB8PN=AB8PN/VB ;µmol/L

CVB8PN= CB8PN*FU8PN ;concentration of free 8PN in plasma

CB8PNnm=CB8PN*1000 ;nM

CB8PNug = CB8PN*MW8PN ;concentration in blood in µg/L = ng/mL

;--------------------------------------------------------------------------------------------------------------------

;portal vein perfused compartment

;AP8PN: amount of 8PN in portal vein perfused tissue ;µmol

CP8PN= AP8PN/VP ;µmol/L

CVP8PN= CP8PN/PP8PN ;partition with portal vein perfused tissue

CP8PNnm=CP8PN*1000 ;nM

;--------------------------------------------------------------------------------------------------------------------

;fat (adipose tissue) compartment

;AF8PN= amount of 8PN in fat tissue ;µmol

CF8PN= AF8PN/VF ;µmol/L

CVF8PN= CF8PN/PF8PN ;partition with fat tissue

CF8PNnm=CF8PN*1000 ;nM

;--------------------------------------------------------------------------------------------------------------------

;rapidly perfused tissue

;AR8PN: amount of 8PN in rapidly perfused tissue ;µmol

CR8PN= AR8PN/VR ;µmol/L

CVR8PN= CR8PN/PR8PN ;partition with rapidly perfused tissue

;--------------------------------------------------------------------------------------------------------------------

;slowly perfused tissue

;AS8PN: amount of 8PN in slowly perfused tissue ;µmol

CS8PN= AS8PN/VS ;µmol/L

CVS8PN= CS8PN/PS8PN ;partition with slowly perfused tissue

CS8PNnm=CS8PN*1000 ;nM

;--------------------------------------------------------------------------------------------------------------------

;kidney

;AK8PN: amount of 8PN in kidney ;µmol

CK8PN= AK8PN/VK ;µmol/L

CVK8PN= CK8PN/PK8PN ;partition with kidney tissue

CK8PNnm=CK8PN*1000 ;nM

;--------------------------------------------------------------------------------------------------------------------

;large intestinal lumen compartment

;ALI8PN: amount of 8PN in large intestine lumen ;µmol

CLI8PN = ALI8PN/VLI ;µmol/L

CLI8PNnm=CLI8PN*1000 ;nM

;--------------------------------------------------------------------------------------------------------------------

;small intestinal lumen compartment

;ASI8PN: amount of 8PN in large intestine lumen ;µmol

CSI8PN = ASI8PN/VSI ;µmol/L

CSI8PNnm=CSI8PN*1000 ;nM

;--------------------------------------------------------------------------------------------------------------------

;uterus

;AU8PN: amount of 8PN in uterus ;µmol

CU8PN= AU8PN/VU ;µmol/L

CU8PNnm=CU8PN*1000 ;nM

CVU8PN= CU8PN/PU8PN ;partition with uterus

;--------------------------------------------------------------------------------------------------------------------

; breast tissue

; ABr8PN: amount of 8PN in breast tissue ;µmol

CBr8PN= ABr8PN/VBr ;µmol/L

CBr8PNnm= CBr8PN*1000 ;nM

CVBr8PN= CBr8PN/PBr8PN ;partition with breast tissue

;--------------------------------------------------------------------------------------------------------------------

;========================================================================

;Sub-model calculations/dynamics: 8PNGluc

;========================================================================

;--------------------------------------------------------------------------------------------------------------------

;liver compartment

;AL8PNGluc: amount of 8PNGluc in liver ;µmol

CL8PNGluc= AL8PNGluc/VL ;µmol/L

CVL8PNGluc= CL8PNGluc/PL8PNGluc ;partition with liver tissue

;--------------------------------------------------------------------------------------------------------------------

;gut tissue compartment

;AG8PNGluc: amount of 8PNGluc in gut tissue ;µmol

CG8PNGluc= AG8PNGluc/VG ;µmol/L

CVG8PNGluc= CG8PNGluc/PG8PNGluc ;partition with gut tissue

;--------------------------------------------------------------------------------------------------------------------

;blood compartment

;AB8PNGluc: amount of 8PNGluc in blood ;µmol

CB8PNGluc=AB8PNGluc/VB ;µmol/L

CVB8PNGluc= CB8PNGluc*FU8PNGluc ;concentration of free 8PNGluc in plasma

CB8PNGlucnm=CB8PNGluc*1000 ;nM

CB8PNGlucug = CB8PNGluc*MW8PNGluc ;concentration in blood in ng/mL

;--------------------------------------------------------------------------------------------------------------------

;portal vein perfused compartment

;AP8PNGluc= amount of 8PNGluc in portal vein perfused tissue ;µmol

CP8PNGluc= AP8PNGluc/VP ;µmol/L

CVP8PNGluc= CP8PNGluc/PP8PNGluc ;partition with portal vein perfused tissue

;--------------------------------------------------------------------------------------------------------------------

;fat (adipose tissue) compartment

;AF8PNGluc= amount of 8PNGluc in fat tissue ;µmol

CF8PNGluc= AF8PNGluc/VF ;µmol/L

CVF8PNGluc= CF8PNGluc/PF8PNGluc ;partition with fat tissue

;--------------------------------------------------------------------------------------------------------------------

;rapidly perfused tissue

;AR8PNGluc= amount of 8PNGluc in rapidly perfused tissue ;µmol

CR8PNGluc= AR8PNGluc/VR ;µmol/L

CVR8PNGluc= CR8PNGluc/PR8PNGluc ;partition with rapidly perfused tissue

;--------------------------------------------------------------------------------------------------------------------

;slowly perfused tissue

;AS8PNGluc= amount of 8PNGluc in slowly perfused tissue ;µmol

CS8PNGluc= AS8PNGluc/VS ;µmol/L

CVS8PNGluc= CS8PNGluc/PS8PNGluc ;partition with slowly perfused tissue

;--------------------------------------------------------------------------------------------------------------------

;kidney

;AK8PNGluc: amount of 8PNGluc in kidney ;µmol

CK8PNGluc= AK8PNGluc/VK ;µmol/L

CVK8PNGluc= CK8PNGluc/PK8PNGluc ;partition with kidney tissue

;--------------------------------------------------------------------------------------------------------------------

;uterus

;AU8PNGluc: amount of 8PNGluc in uterus ;µmol

CU8PNGluc= AU8PNGluc/VU ;µmol/L

CU8PNGlucnm=CU8PNGluc*1000 ;nM

CVU8PNGluc= CU8PNGluc/PU8PNGluc ;partition with uterus

;--------------------------------------------------------------------------------------------------------------------

; breast tissue

; ABr8PNGluc: amount of 8PNGluc in breast tissue ;µmol

CBr8PNGluc= ABr8PNGluc/VBr ;µmol/L

CBr8PNGlucnm= CBr8PNGluc*1000 ;nM

CVBr8PNGluc= CBr8PNGluc/PBr8PNGluc ;partition with breast tissue

;--------------------------------------------------------------------------------------------------------------------

;=====================================================================

;Model mass balance calculation

;=====================================================================

Total = AODOSEIXN + AODOSE8PN

Calculated=ASIIXN + ALIIXN + AGIXN+ ALIXN + APIXN + AFIXN + ABIXN+ ARIXN + ASIXN+ AKIXN+ ALIXNGluc + AGIXNGluc+ AL8PN+ IXNExUr + APIXNGluc + ABIXNGluc + AFIXNGluc+ ARIXNGluc + ASIXNGluc + AUIXNGluc+ AKIXNGluc + AG8PN + AB8PN+ AP8PN+ AR8PN + AS8PN + AK8PN+ AF8PN + ALI8PN +ASI8PN +AU8PN + Eliminate8PN+IXN8PNExUr+ IXNGlucExUr+ IXex + AL8PNGluc + AG8PNGluc+ AB8PNGluc+ AP8PNGluc+ AR8PNGluc + AS8PNGluc + AK8PNGluc+ AF8PNGluc +PNGlucEx +AU8PNGluc+ ABrIXN+ ABrIXNGluc+ ABr8PN+ ABr8PNGluc

ERROR= ((Total-Calculated)/Total + 1E-30)*100

MASSBAL=Total-Calculated + 1

{End Globals}

;=====================================================================

{Top model}

{Reservoirs}

d/dt (ASIIXN) = - transSI - transSItoG- FMSI8PN

INIT ASIIXN = AODOSEIXN

LIMIT ASIIXN >= 0

d/dt (ALIIXN) = + transSI - transLItoL - transLI - FMLI8PN

INIT ALIIXN = 0

LIMIT ALIIXN >= 0

d/dt (AGIXN) = + artG - venG + transSItoG - FGIXNGluc

INIT AGIXN = 0

LIMIT AGIXN >= 0

d/dt (ALIXN) = + transLItoL + venP + venG + artL - venL - FLIXNGluc - FLiXN8PNc

INIT ALIXN = 0

LIMIT ALIXN >= 0

d/dt (APIXN) = - venP + artP

INIT APIXN = 0

LIMIT APIXN >= 0

d/dt (ABIXN) = - artP - artG - artF + venF - artR + venR - artS + venS - artK + venK - artL + venL + venU - artU + venBr - artBr

INIT ABIXN = 0

LIMIT ABIXN >= 0

d/dt (AFIXN) = + artF - venF

INIT AFIXN = 0

LIMIT AFIXN >= 0

d/dt (ARIXN) = + artR - venR

INIT ARIXN = 0

LIMIT ARIXN >= 0

d/dt (ASIXN) = + artS - venS

INIT ASIXN = 0

LIMIT ASIXN >= 0

d/dt (AKIXN) = + artK - venK - urineiXN

INIT AKIXN = 0

LIMIT AKIXN >= 0

d/dt (IXNExUr) = + urineiXN

INIT IXNExUr = 0

LIMIT IXNExUr >= 0

d/dt (IXex) = + transLI

INIT IXex = 0

LIMIT IXex >= 0

d/dt (AUIXN) = - venU + artU

INIT AUIXN = 0

LIMIT AUIXN >= 0

d/dt (ABrIXN) = - venBr + artBr

INIT ABrIXN = 0

LIMIT ABrIXN >= 0

{Flows}

transSI = ASIIXN*Ksi

transLItoL = KbIXN*CLIIXN

venP = QP*CVPIXN

artP = QP*CBIXN

artG = QG*CBIXN

venG = QG*CVGIXN

artF = QF*CBIXN

venF = QF*CVFIXN

artR = QR*CBIXN

venR = QR*CVRIXN

artS = QS*CBIXN

venS = QS*CVSIXN

artK = QK*CBIXN

venK = QK*CVKIXN

urineiXN = GFR*CVBIXN*60/1000

artL = QLA*CBIXN

venL = QL*CVLIXN

transSItoG = KaIXN*CSIIXN

transLI = ALIIXN*Kli

venU = QU*CVUIXN

venBr = QBr*CVBrIXN

artU = QU*CBIXN

artBr=QBr*CBIXN

{Submodel "IXNglucuronide"}

{Reservoirs}

d/dt (ALIXNGluc) = + FLIXNGluc + venP1 + venG1 - venL1 + artL1

INIT ALIXNGluc = 0

LIMIT ALIXNGluc >= 0

d/dt (AGIXNGluc) = + FGIXNGluc - venG1 + artG1

INIT AGIXNGluc = 0

LIMIT AGIXNGluc >= 0

d/dt (APIXNGluc) = + artP1 - venP1

INIT APIXNGluc = 0

LIMIT APIXNGluc >= 0

d/dt (ABIXNGluc) = - artP1 - artG1 - artF1 + venF1 - artR1 + venR1 - artS1 + venS1 - artK1 + venK1 + venL1 - artL1 - artU1 + venU1+ venBr1 - artBr1

INIT ABIXNGluc = 0

LIMIT ABIXNGluc >= 0

d/dt (AFIXNGluc) = + artF1 - venF1

INIT AFIXNGluc = 0

LIMIT AFIXNGluc >= 0

d/dt (ARIXNGluc) = + artR1 - venR1

INIT ARIXNGluc = 0

LIMIT ARIXNGluc >= 0

d/dt (ASIXNGluc) = + artS1 - venS1

INIT ASIXNGluc = 0

LIMIT ASIXNGluc >= 0

d/dt (AKIXNGluc) = + artK1 - venK1 - urineiXNGluc

INIT AKIXNGluc = 0

LIMIT AKIXNGluc >= 0

d/dt (IXNGlucExUr) = + urineiXNGluc

INIT IXNGlucExUr = 0

LIMIT IXNGlucExUr >= 0

d/dt (AUIXNGluc) = + artU1 - venU1

INIT AUIXNGluc = 0

LIMIT AUIXNGluc >= 0

d/dt (ABrIXNGluc) = - venBr1 + artBr1

INIT ABrIXNGluc = 0

LIMIT ABrIXNGluc >= 0

{Flows}

FLIXNGluc = VmaxLIXNGlucs*CVLIXN/(KmLIXNGluc+CVLIXN)

FGIXNGluc = VmaxGIXNGlucs*CVGIXN/(KmGIXNGluc+CVGIXN)

artP1 = QP*CBIXNGluc

venP1 = QP*CVPIXNGluc

venG1 = QG*CVGIXNGluc

artG1 = QG*CBIXNGluc

artF1 = QF*CBIXNGluc

venF1 = QF*CVFIXNGluc

artR1 = QR*CBIXNGluc

venR1 = QR*CVRIXNGluc

artS1 = QS*CBIXNGluc

venS1 = QS*CVSIXNGluc

artK1 = QK*CBIXNGluc

venK1 = QK*CVKIXNGluc

venL1 = QL*CVLIXNGluc

artL1 = QLA*CBIXNGluc

urineiXNGluc = GFR*CVBIXNGluc*60/1000

artU1 = QU*CBIXNGluc

venU1 = QU*CVUIXNGluc

venBr1 = QBr*CVBrIXNGluc

artBr1 = QBr*CBIXNGluc

{Submodel "PN"}

{Reservoirs}

d/dt (AL8PN) = + FLiXN8PNc + venG2 + artL2 - venL2 + venP2 - FL8PN + transLItoL8PN

INIT AL8PN = 0

LIMIT AL8PN >= 0

d/dt (AG8PN) = - venG2 + artG2 - FG8PN

INIT AG8PN = 0

LIMIT AG8PN >= 0

d/dt (AB8PN) = - artL2 - artG2 + venL2 - artP2 - artR2 + venR2 - artS2 + venS2 - artK2 + venK2 - artF2 + venF2 - artU2 + venU2+ venBr2 - artBr2

INIT AB8PN = 0

LIMIT AB8PN >= 0

d/dt (AP8PN) = + artP2 - venP2

INIT AP8PN = 0

LIMIT AP8PN >= 0

d/dt (AR8PN) = + artR2 - venR2

INIT AR8PN = 0

LIMIT AR8PN >= 0

d/dt (AS8PN) = + artS2 - venS2

INIT AS8PN = 0

LIMIT AS8PN >= 0

d/dt (AK8PN) = + artK2 - venK2 - urine8PN

INIT AK8PN = 0

LIMIT AK8PN >= 0

d/dt (AF8PN) = + artF2 - venF2

INIT AF8PN = 0

LIMIT AF8PN >= 0

d/dt (Eliminate8PN) = + FL8PN + FG8PN

INIT Eliminate8PN = 0

LIMIT Eliminate8PN >= 0

d/dt (IXN8PNExUr) = + urine8PN

INIT IXN8PNExUr = 0

LIMIT IXN8PNExUr >= 0

d/dt (ALI8PN) = - transLItoL8PN + transSItoLI8PN+ FMLI8PN

INIT ALI8PN = 0

LIMIT ALI8PN >= 0

d/dt (ASI8PN) = - transSItoLI8PN+ FMSI8PN

INIT ASI8PN = AODOSE8PN

LIMIT ASI8PN >= 0

d/dt (AU8PN) = + artU2 - venU2

INIT AU8PN = 0

LIMIT AU8PN >= 0

d/dt (ABr8PN) = - venBr2 + artBr2

INIT ABr8PN = 0

LIMIT ABr8PN >= 0

{Flows}

FLiXN8PNc = VmaxLiXN8PNs*CVLIXN/(KmLiXN8PN+CVLIXN)

venG2 = QG*CVG8PN

artL2 = QLA*CB8PN

artG2 = QG*CB8PN

venL2 = QL*CVL8PN

artP2 = QP*CB8PN

venP2 = QP*CVP8PN

artR2 = QR*CB8PN

venR2 = QR*CVR8PN

artS2 = QS*CB8PN

venS2 = QS*CVS8PN

artK2 = QK*CB8PN

venK2 = QK*CVK8PN

artF2 = QF*CB8PN

venF2 = QF*CVF8PN

FL8PN = VmaxL8PNs* CVL8PN/(KmL8PN + CVL8PN)

FG8PN = VmaxG8PNs* CVG8PN/(KmG8PN + CVG8PN)

urine8PN = GFR*CVB8PN*60/1000

transLItoL8PN = Kb8PN*CLI8PN

transSItoLI8PN = Ka8PN*CSI8PN

artU2 = QU*CB8PN

venU2 = QU*CVU8PN

FMLI8PN = VmaxM8PNs*CLIIXN/(KmM8PN+CLIIXN)

FMSI8PN = VmaxM8PNs*CSIIXN/(KmM8PN+CSIIXN)

venBr2 = QBr*CVBr8PN

artBr2 = QBr*CB8PN

{Submodel "PNGluc"}

{Reservoirs}

d/dt (AP8PNGluc) = + artP3 - venP3

INIT AP8PNGluc = 0

LIMIT AP8PNGluc >= 0

d/dt (AL8PNGluc) = + venP3 + venG3 - venL3 + FL8PN

INIT AL8PNGluc = 0

LIMIT AL8PNGluc >= 0

d/dt (AG8PNGluc) = + artG3 - venG3 + FG8PN

INIT AG8PNGluc = 0

LIMIT AG8PNGluc >= 0

d/dt (AF8PNGluc) = + artF3 - venF3

INIT AF8PNGluc = 0

LIMIT AF8PNGluc >= 0

d/dt (AR8PNGluc) = + artR3 - venR3

INIT AR8PNGluc = 0

LIMIT AR8PNGluc >= 0

d/dt (AU8PNGluc) = + artU3 - venU3

INIT AU8PNGluc = 0

LIMIT AU8PNGluc >= 0

d/dt (AS8PNGluc) = + artS3 - venS3

INIT AS8PNGluc = 0

LIMIT AS8PNGluc >= 0

d/dt (AK8PNGluc) = + artK3 - venK3 - urine8PNGluc

INIT AK8PNGluc = 0

LIMIT AK8PNGluc >= 0

d/dt (AB8PNGluc) = - artP3 - artG3 - artF3 - artR3 - artS3 - artU3 - artK3 + venL3 + venF3 + venR3 + venS3 + venU3 + venK3 + venBr3 - artBr3

INIT AB8PNGluc = 0

LIMIT AB8PNGluc >= 0

d/dt (PNGlucEx) = + urine8PNGluc

INIT PNGlucEx = 0

LIMIT PNGlucEx >= 0

d/dt (ABr8PNGluc) = - venBr3 + artBr3

INIT ABr8PNGluc = 0

LIMIT ABr8PNGluc >= 0

{Flows}

artP3 = QP*CB8PNGluc

artG3 = QG*CB8PNGluc

artF3 = QF*CB8PNGluc

artR3 = QR*CB8PNGluc

artS3 = QS*CB8PNGluc

artU3 = QS*CB8PNGluc

artK3 = QK*CB8PNGluc

venP3 = QP*CVP8PNGluc

venG3 = QG*CVG8PNGluc

venL3 = QL*CVL8PNGluc

venF3 = QF*CVF8PNGluc

venR3 = QR*CVR8PNGluc

venS3 = QS*CVS8PNGluc

venU3 = QU*CVU8PNGluc

venK3 = QK*CVK8PNGluc

urine8PNGluc = GFR*CVB8PNGluc*60/1000

FG8PN = VmaxG8PNs* CVG8PN/(KmG8PN + CVG8PN)

FL8PN = VmaxL8PNs* CVL8PN/(KmL8PN + CVL8PN)

venBr3 = QBr*CVBr8PNGluc

artBr3 = QBr*CB8PNGluc

**References**

1 Valentin, J. *Basic anatomical and physiological data for use in radiological protection reference values: ICRP publication 89*. Vol. 32 1-277 (2002).

2 Mendez-Catala, D. M., Wang, Q. R. & Rietjens, I. M. C. M. PBK model-based prediction of intestinal microbial and host metabolism of zearalenone and consequences for its estrogenicity. *Mol Nutr Food Res* **65**, 2100443, doi: 210044310.1002/mnfr.202100443 (2021).

3 Levey, A. S., Inker, L. A. & Coresh, J. GFR estimation: from physiology to public health. *Am J Kidney Dis* **63**, 820-834, doi:10.1053/j.ajkd.2013.12.006 (2014).

4 Punt, A., Pinckaers, N., Peijnenburg, A. & Louisse, J. Development of a web-based toolbox to support quantitative in-vitro-to-in-vivo extrapolations (QIVIVE) within nonanimal testing strategies. *Chem Res Toxicol* **34**, 460-472, doi:10.1021/acs.chemrestox.0c00307 (2021).

5 Moens, E. *et al.* Exploration of isoxanthohumol bioconversion from spent hops into 8-prenylnaringenin using resting cells of Eubacterium limosum. *AMB Express* **10**, 79, doi:10.1186/s13568-020-01015-5 (2020).

6 Wang, Y. T. *et al.* Regional gastrointestinal transit and pH studied in 215 healthy volunteers using the wireless motility capsule: influence of age, gender, study country and testing protocol. *Aliment Pharmacol Ther* **42**, 761-772, doi:10.1111/apt.13329 (2015).

7 Sun D, L. H., Welage L S, Barnett J L, Landowski C P, Foster D, Fleisher D, Lee K D, and Amidon G L. Comparison of human duodenum and Caco-2 gene expression profiles for 12,000 gene sequences tags and correlation with permeability of 26 drugs. *Pharmacol Res* **19**, 1400-1416, doi: 10.1023/a:1020483911355 (2002).

8 Wang, X., He, B., Shi, J., Li, Q. & Zhu, H. J. Comparative proteomics analysis of human liver microsomes and S9 fractions. *Drug Metab Dispos* **48**, 31-40, doi:10.1124/dmd.119.089235 (2020).

9 Chen, Y., Liu, L., Nguyen, K. & Fretland, A. J. Utility of intersystem extrapolation factors in early reaction phenotyping and the quantitative extrapolation of human liver microsomal intrinsic clearance using recombinant cytochromes P450. *Drug Metab Dispos* **39**, 373-382, doi:10.1124/dmd.110.035147 (2011).

10 Guo, J., Nikolic, D., Chadwick, L. R., Pauli, G. F. & van Breemen, R. B. Identification of human hepatic cytochrome P450 enzymes involved in the metabolism of 8-prenylnaringenin and isoxanthohumol from hops (Humulus lupulus L.). *Drug Metab Dispos* **34**, 1152-1159, doi:10.1124/dmd.105.008250 (2006).

11 Peters, S. A., Jones, C. R., Ungell, A. L. & Hatley, O. J. Predicting drug extraction in the human gut wall: assessing contributions from drug metabolizing enzymes and transporter proteins using preclinical models. *Clin Pharmacokinet* **55**, 673-696, doi:10.1007/s40262-015-0351-6 (2016).

12 Wang, Q. R., Spenkelink, B., Boonpawa, R. & Rietjens, I. M. C. M. Use of Physiologically Based Pharmacokinetic Modeling to Predict Human Gut Microbial Conversion of Daidzein to S-Equol. *Journal of Agricultural and Food Chemistry* **70**, 343-352, doi:10.1021/acs.jafc.1c03950 (2022).
